# Supplementary material for: Discovery of a small molecule targeting SET-PP2A interaction to overcome BCR-ABLT315I mutation of chronic myeloid leukemia
Source: PubMed Central journal article supplement (PMC4494927; doi:10.18632/oncotarget.3665), 2015-03-26
Supplement: oncotarget-06-12128-s001.pdf [file oncotarget-06-12128-s001.pdf]

# Discovery of a small molecule targeting SET-PP2A interaction to overcome BCR-ABL<sup>T315I</sup> mutation of chronic myeloid leukemia

## Supplementary Material

### Table of contents

|                                                                                                                                 |    |
|---------------------------------------------------------------------------------------------------------------------------------|----|
| Materials & Instrumentation.....                                                                                                | 2  |
| Synthesis.....                                                                                                                  | 3  |
| Reference.....                                                                                                                  | 10 |
| Supplementary Scheme 1: Synthetic route of TGI1002.....                                                                         | 11 |
| Supplementary Scheme 2: Synthesis of TGI1002 derivative as an affinity probe...                                                 | 12 |
| Supplementary Figure S1: HRMS, <sup>1</sup> H and <sup>13</sup> C NMR and IR analyses of TGI1002.....                           | 13 |
| Supplementary Figure S2: Western blots of PDGFR $\alpha$ and EphB2 expression in K562 and BaF3-p210 <sup>T315I</sup> cells..... | 16 |
| Supplementary Figure S3: HRMS, <sup>1</sup> H and <sup>13</sup> C NMR and IR analyses of <b>10</b> .....                        | 17 |
| Supplementary Figure S4: HRMS, <sup>1</sup> H and <sup>13</sup> C NMR and IR analyses of TGI1002-COOH.....                      | 20 |
| Supplementary Figure S5: IR spectral analysis of TGI1002-affinity probe.....                                                    | 23 |
| Supplementary Figure S6: SDS-PAGE of purified SET protein.....                                                                  | 25 |
| Supplementary Table S1: <i>In vitro</i> profile on kinase inhibition of TGI1002.....                                            | 26 |
| Supplementary Table S2: MALDI-TOF-TOF analysis of TGI1002 binding proteins.....                                                 | 27 |

## **Materials & Instrumentation**

The starting materials, other reagents and solvents for chemical synthesis were acquired from Sigma-Aldrich unless otherwise noted. Melting points were determined using YRT-3 melting point detector. High resolution mass spectra (HRMS) were obtained on 6200 series TOF/6500 series spectrometer (Agilent Technologies).  $^1\text{H}$  NMR and  $^{13}\text{C}$  NMR spectra were recorded on Bruker AV300 NMR spectrometer. IR spectra were measured by Bruker Tensor 27 FT-IR spectrometer.

## Synthesis

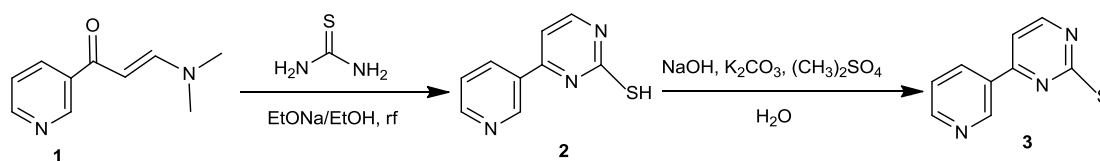

**Preparation of 2-(methylthio)-4-(3-pyridinyl)pyrimidine (3).** Sodium ethoxide (13.91 g, 0.2 mol) was dissolved in 150 mL anhydrous ethanol, then 15.55 g thiourea (0.2 mol) and 3-dimethylamino-1-(3-pyridin-2-yl)prop-2-en-1-one (**1**) (30 g, 0.17 mol) was added and heated to reflux for 2-3 h. Water (25 mL) was added into the solution. The mixture was then acidified with acetic acid to pH  $\approx$  5 and kept for 30 min under 0 °C to give yellow precipitate. After removing the solvent, the precipitate was washed with water to afford 2-methyl-4-(pyridin-2-yl)pyrimidine hydrosulfide (**2**). The above obtained compound **2**, K<sub>2</sub>CO<sub>3</sub> (23.46 g, 0.17 mol) and NaOH (4.76 g, 0.12 mol) were dissolved in 200 mL water. Dimethyl sulfate (25.79 g, 0.2 mol) was added dropwise with stirring at 0-5 °C within 30 min, after which 60 mL water was added to the reaction solution. The precipitate was washed with water and dried to give **3** as a yellow powder (23.7 g, purity > 98%, yield 68.5%). Mp: 106-108 °C; MS-ESI<sup>+</sup> m/z, 204 (MH<sup>+</sup>); <sup>1</sup>H NMR (300 MHz, CDCl<sub>3</sub>):  $\delta$  9.28 (d, 1H, J=2.3 Hz), 8.74 (dd, 1H, J=1.5, 4.8 Hz), 8.61 (d, 1H, J=5.3 Hz), 8.42 (m, 1H), 7.45 (m, 1H), 7.41 (d, 1H, J=5.3 Hz), 2.65 (s, 3H).

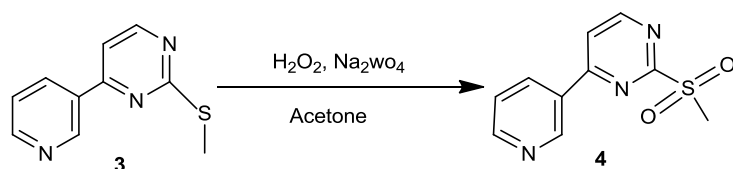

**Preparation of 2-(methylsulfonyl)-4-(pyridin-3-yl)pyrimidine (4).** Compound **3** (9.81 g, 45 mmol) was dissolved in 45 mL acetone and heated to reflux for 30 min, and Na<sub>2</sub>WO<sub>4</sub> (0.91 g) was added. After stirring for 10 min, H<sub>2</sub>O<sub>2</sub> (12.34 g, 89 mmol) was added dropwise within 30 min. The solution was heated to reflux for 3-5 h, after which insoluble solid was formed. Na<sub>2</sub>S<sub>2</sub>O<sub>3</sub> (4.5 g) dissolved in 100 mL was added to the mixture with stirring, and kept for 30 min at 0-5 °C. After removing the solvent, the residue was dried at 60 °C to afford **4** (8.5 g, purity > 95%, yield 80%). Mp: 151-153 °C; MS-ESI<sup>+</sup> m/z, 236 (MH<sup>+</sup>); <sup>1</sup>H NMR (300 MHz, CDCl<sub>3</sub>): δ 9.34 (dd, 1H, J=0.8, 2.4 Hz), 9.01 (d, 1H, J=5.3 Hz), 8.82 (dd, 1H, J=1.6, 4.7 Hz), 8.54 (dd, 1H, J=1.6, 2.4 Hz), 7.99 (d, 1H, J=5.3 Hz), 7.52 (m, 1H), 3.45 (s, 3H).

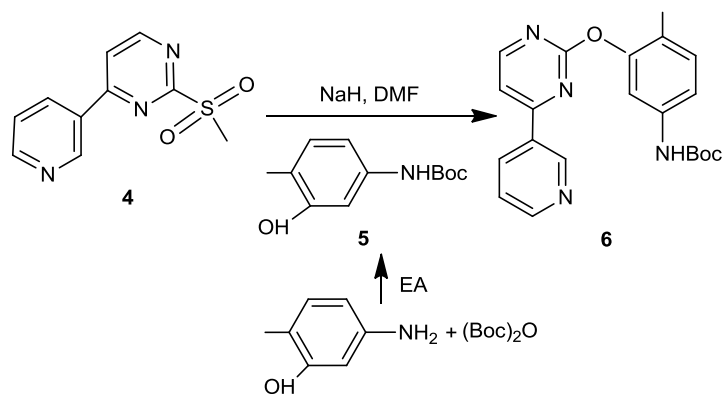

### Preparation of tert-butyl (4-methyl-3-((4-(pyridin-3-yl)pyrimidin-2-yl)

**-oxy)phenyl)-carbamate (6).** 5-Amino-2-methylphenol (25 g, 0.203 mol) was dissolved in 400 mL ethyl acetate (EA), and (Boc)<sub>2</sub>O (47 g, 0.203 mol) was then added with stirring. The solution was stirred for 24 h at room temperature (RT), washed with 10% NaOH and water, and dried and concentrated. After isolating by column chromatography (ethyl acetate/ethane = 1/5), tert-butyl (3-hydroxy-4-methylphenyl)carbamate (**5**) was obtained as a white solid (43 g, yield 95%). Compound **4** (20.75 g, 0.88 mol) and **5** (19.62 g, 0.88 mol) were dissolved in 100 mL N,N-dimethylformamide (DMF), and 60% NaH (6.02 g, 0.25 mol) was then added with stirring at 0 °C. The reaction was carried out at 40~50 °C for 0.5~1 h. The pH of the reaction solution was then adjusted with 300 mL 3N HCl to 5~6, followed by adding 200 mL ice-water, and stirred for 30 min at RT. After removing the solvent, the light yellow solid was dried to give compound **6** (32.17 g, purity > 95%, yield 80%). Mp:161-162 °C; MS-ESI<sup>+</sup> m/z 379 (MH<sup>+</sup>); <sup>1</sup>H NMR (300 MHz, CDCl<sub>3</sub>): δ 9.22 (dd, 1H, J=0.8, 2.3 Hz), 8.72 (dd, 1H, J=1.5, 4.6 Hz), 8.61 (d, 1H, J=5.1 Hz), 8.36 (m, 1H), 7.46 (d, 1H, J=5.1 Hz), 7.42 (m, 1H), 7.37 (br, 1H), 7.19 (d, 1H, J=8.3 Hz), 7.08 (m, 1H), 6.58 (br, 1H), 2.15 (s, 3H), 1.49 (s, 9H).

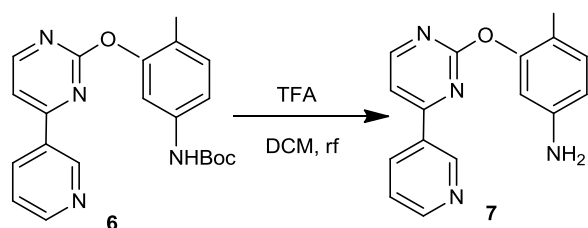

### Preparation of 4-methyl-3-((4-(pyridin-3-yl)pyrimidin-2-yl)oxy)aniline (**7**).

Compound **6** (32.17 g, 85 mmol) was dissolved in 130 mL dichloromethane (DCM), in which 100 g trifluoroacetate was added at 0 °C. The solution was heated to reflux for 2-3 h, and then pH was adjusted to 8-9 with 10% NaOH. The organic phase was washed with water, and DCM was removed by evaporation. The residue was treated with 50 mL ethanol for 1 h, filtered and dried to afford yellow solid **7** (23.7 g, purity > 98%, yield 95%). Mp: 155-157 °C; MS-ESI<sup>+</sup> m/z 279 (MH<sup>+</sup>); <sup>1</sup>H NMR (300 MHz, CDCl<sub>3</sub>): δ 9.23 (d, 1H, J=2.3 Hz), 8.73 (dd, 1H, J=1.5, 4.7 Hz), 8.62 (d, 1H, J=5.3 Hz), 8.37 (m, 1H), 7.46 (d, 1H, J=5.3 Hz), 7.43 (m, 1H), 7.08 (d, 1H, J=8.0 Hz), 6.52-6.56 (m, 2H), 2.07 (s, 3H).

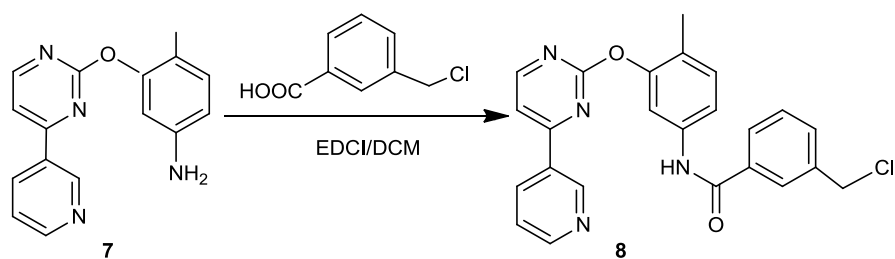

### Preparation of 3-(chloromethyl)-N-(4-methyl-3-((4-pyridin-3-yl)pyrimidin

**-2-yl)-oxy)phenyl)-benzamide (8).** 3-(Chloromethyl)benzoic acid (12.6 g, 74 mmol) and EDCI (17 g, 89 mmol) were dissolved in 110 mL DCM, followed by adding 13.7 g compound **7** at 10 °C, and heated to reflux for 1-2 h. The solution was washed successively with 250 mL water and NaHCO<sub>3</sub>. After removing the organic phase, the yellow solid **8** was obtained (12.5 g, purity > 95%, yield 59%).

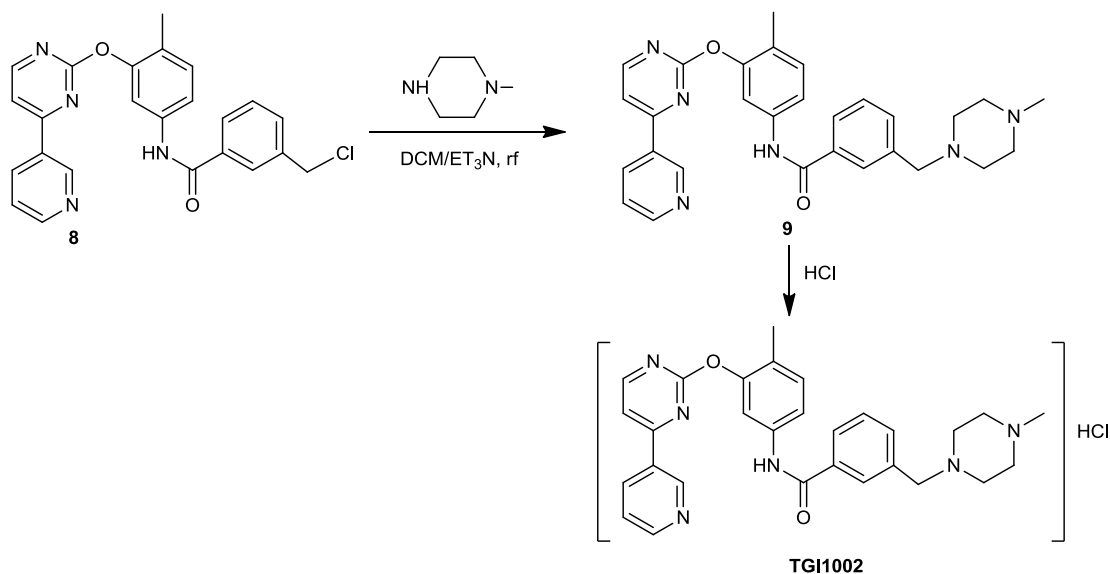

**Preparation of N-(4-methyl-3-((4-(pyridin-3-yl)pyrimidin-2-yl)oxy)phenyl)-3-((4-methylpiperazin-1-yl)methyl)benzamide hydrochloride (TGI1002).**

Compound **8** (12.4 g, 28 mmol), 1-methylpiperazine (3.45 g, 34 mmol) and  $\text{ET}_3\text{N}$  (1.74 mL, 17 mmol) were added to 75 mL of DCM and stirred for 15 h at RT. The organic phase was collected, dried and filtered to give **9**. Compound **9** was then purified by column chromatograph (chloroform/methanol=20/1). Purified **9** (2 g) was dissolved in 5 mL methanol containing 10% HCl, and TGI1002 was then obtained as a yellow powder after removing the solvent. The total yield of TGI1002 was 60% and the purity was > 99% by HPLC analysis. Mp: 85.1-89.3°C; HRMS ( $m/z$ ):  $[\text{M}]^+$  calcd. for  $\text{C}_{29}\text{H}_{30}\text{N}_6\text{O}_2$  495.2430, observed 495.2525;  $^1\text{H}$  NMR (300 MHz,  $\text{D}_2\text{O}$ ):  $\delta$  9.39 (s, 1H), 9.14 (d, 1H,  $J = 8.2\text{Hz}$ ), 9.01 (d, 1H,  $J = 5.6\text{ Hz}$ ), 8.75 (d, 1H,  $J = 5.2\text{ Hz}$ ), 8.23~8.28 (m, 1H), 8.05 (s, 1H), 7.84~7.95 (m, 3H), 7.67~7.72 (m, 1H), 7.52 (s, 1H), 7.30 (brs, 2H), 4.68 (s, 2H), 3.84 (br, 8H), 3.17 (s, 3H), 2.09 (s, 3H);  $^{13}\text{C}$  NMR (75 MHz,  $\text{D}_2\text{O}$ ):  $\delta$  165.4, 162.4, 160.0, 159.0, 148.4, 142.7, 141.2, 138.6, 134.4, 133.2, 133.1, 132.9, 130.0, 128.5, 128.2, 127.5, 126.5, 125.9, 125.7, 117.5, 113.3, 111.6, 58.1, 48.4, 46.5, 41.1, 13.1; IR (KBr)  $\gamma$  3408.0, 3061.2, 2927.4, 2644.3, 2562.0, 1635.8, 1582.6, 1566.9, 1505.9, 1454.9, 1385.8, 1284.9, 1263.0, 1207.7, 1095.3, 1012.5, 949.0, 812.2, 742.7, 670.6  $\text{cm}^{-1}$ .



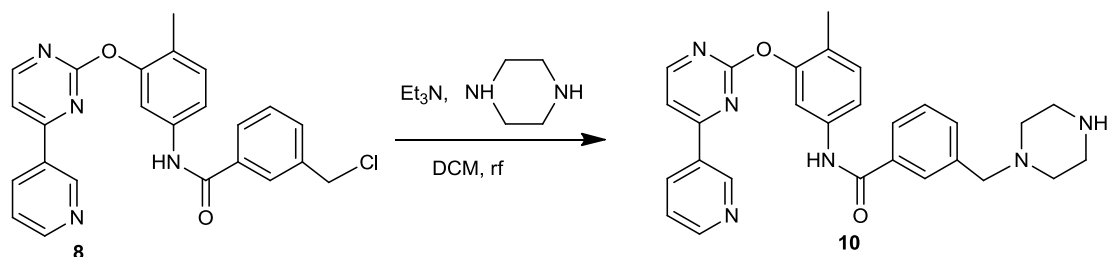

**Preparation of N-(4-methyl-3-((4-(pyridin-3-yl)pyrimidin-2-yl)oxy)phenyl)-3-**

**(piperazin-1-yl-methyl)benzamide (10).** Synthesis and purification of compound **10**

was performed with the same procedures as compound **9** except using piperazine to

replace 1-methyl-piperazine. Mp: 86.2-90.1 °C ; HRMS ( $m/z$ ):  $[M]^+$  calcd. for

$C_{28}H_{28}N_6O_2$  481.2274, observed 481.2349;  $^1H$  NMR (300 MHz,  $D_2O$ ):  $\delta$  9.33 (s, 1H),

9.11 (d, 1H,  $J = 8.2$  Hz), 8.90 (d, 1H,  $J = 5.5$  Hz), 8.68 (d, 1H,  $J = 5.2$  Hz), 8.16~8.20

(m, 1H), 7.95 (br, 1H), 7.90~7.94 (m, 2H), 7.82 (d, 1H,  $J = 5.2$  Hz), 7.60~7.75 (m,

2H), 7.46 (s, 1H), 7.32 (brs, 2H), 4.55 (s, 2H), 3.62 (br, 8H), 2.06 (s, 3H);  $^{13}C$  NMR

(75 MHz,  $D_2O$ ):  $\delta$  170.6, 167.0, 165.0, 164.4, 163.8, 153.0, 147.7, 145.4, 143.1, 138.8,

137.9, 137.6, 137.5, 134.5, 133.0, 132.6, 132.0, 130.8, 130.7, 130.4, 122.6, 118.3,

116.2, 62.9, 50.7, 43.3, 17.5; IR (KBr)  $\gamma$  3407.8, 2928.6, 2709.7, 2571.8, 1661.5,

1634.4, 1584.3, 1567.5, 1506.4, 1445.7, 1387.0, 1286.7, 1262.3, 1211.2, 1162.7,

1095.3, 1013.1, 951.2, 811.2, 669.7  $cm^{-1}$ .

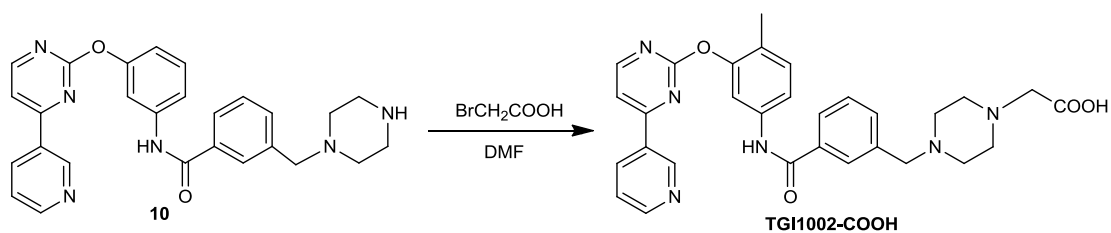

**Preparation of 2-(4-(3-((4-methyl-3-((4-(pyridin-3-yl)pyrimidin-2-yl)oxy)-phenyl)carbamoyl)benzyl)piperazin-1-yl)acetic acid (TGI1002-COOH).**

TGI1002-COOH was synthesized from compound **10** based on previous report (1).

Mp: 89.1-104.2°C; HRMS (*m/z*): [M]<sup>+</sup> calcd. for C<sub>30</sub>H<sub>30</sub>N<sub>6</sub>O<sub>4</sub> 539.2329, observed 539.2440; <sup>1</sup>H NMR (300 MHz, DMSO): δ 10.37 (s, 1H), 9.51 (s, 1H), 9.08 (d, 1H, *J* = 8.7Hz), 8.90 (d, 1H, *J* = 5.1Hz), 8.79 (d, 1H, *J* = 4.8Hz), 8.32 (s, 1H), 8.15~8.19 (m, 1H), 7.94 (d, 1H, *J* = 5.4 Hz), 7.81 (br, 1H), 7.64 (s, 1H), 7.46~7.49 (m, 3H), 7.32 (d, 1H, *J* = 8.1 Hz), 5.1 (s, 2H), 3.28 (br, 4H), 3.03 (br, 2H), 2.56 (br, 4H), 2.07 (s, 3H); <sup>13</sup>C NMR (75 MHz, DMSO): δ 166.8, 165.2, 162.8, 161.2, 151.3, 147.5, 144.9, 143.0, 138.3, 138.0, 135.5, 135.2, 133.2, 131.9, 129.3, 128.9, 128.2, 127.2, 126.2, 118.8, 114.8, 114.0, 63.5, 61.7, 49.8, 43.7, 16.0; IR (KBr) γ 3443.7, 2961.7, 2823.0, 1590.8, 1383.1, 1352.8, 1288.3, 1206.2, 1125.8, 1099.2, 1002.4 cm<sup>-1</sup>.

## Reference

1. D'Alessandro PL, et al. The identification of structurally novel, selective, orally bioavailable positive modulators of mGluR2. *Bioorg Med Chem Lett* 2010; 20: 759-762.

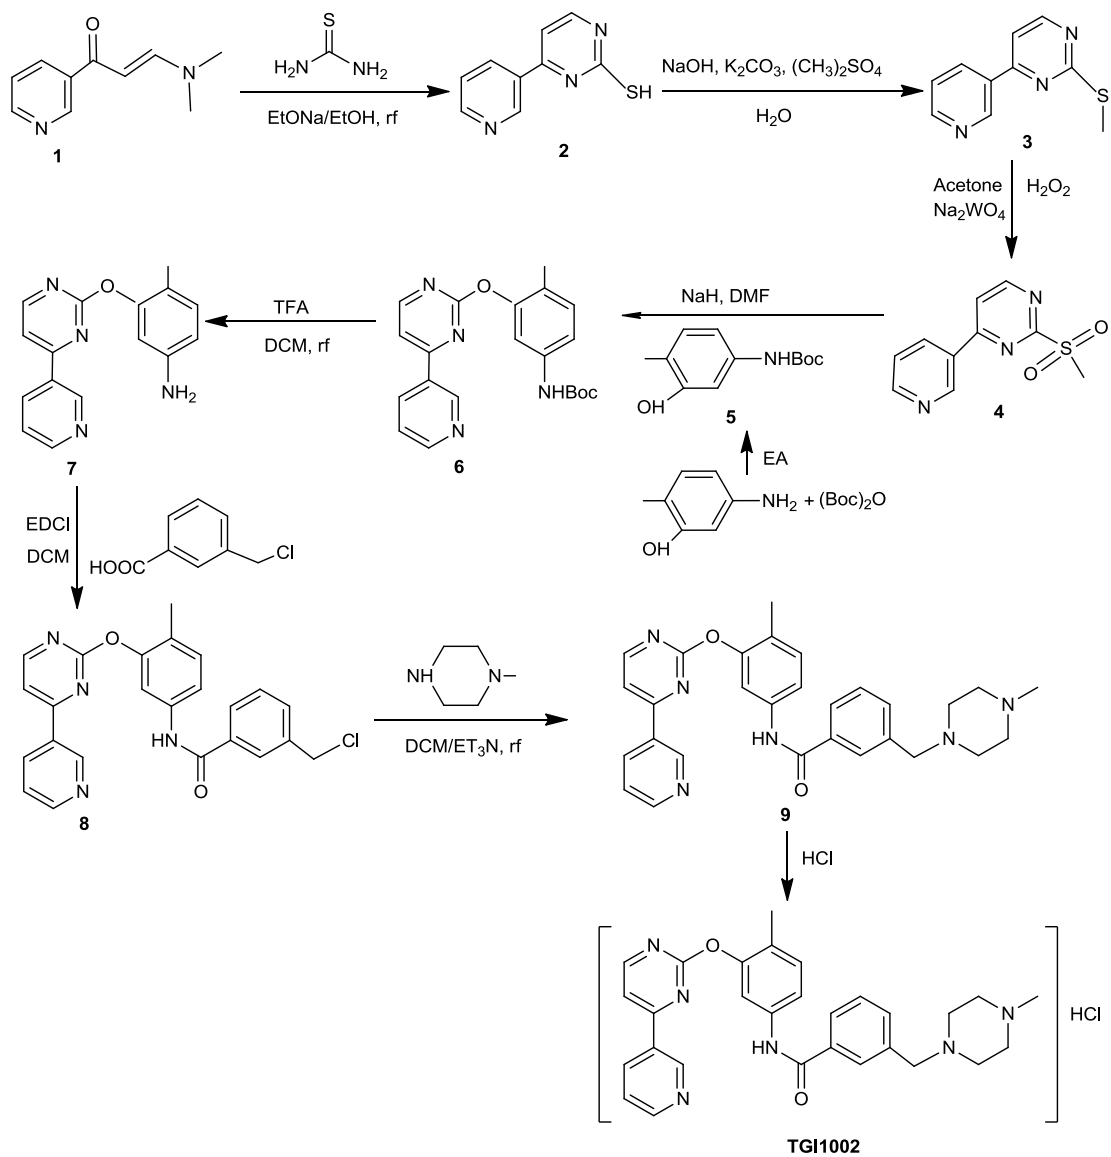

**Supplementary Scheme 1: Synthetic route of TGI1002.**

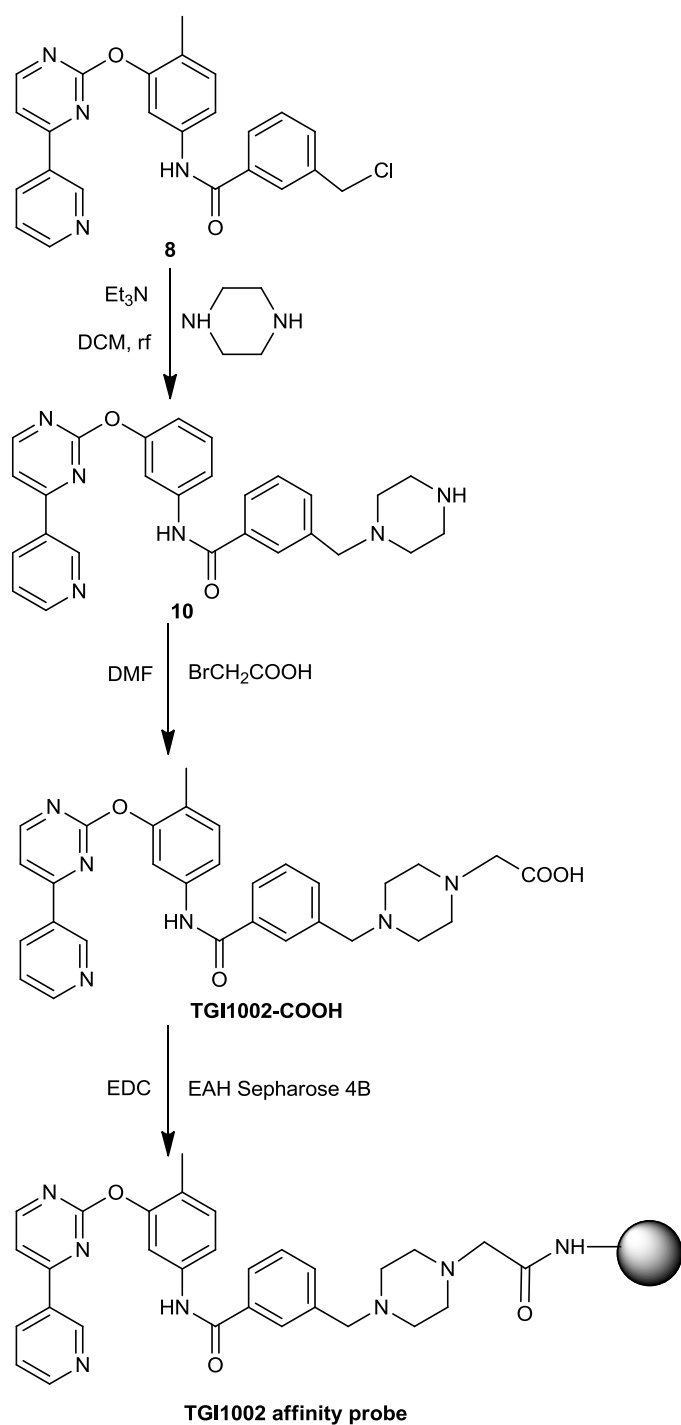

**Supplementary Scheme 2: Synthesis of TGI102 derivative as an affinity probe.**

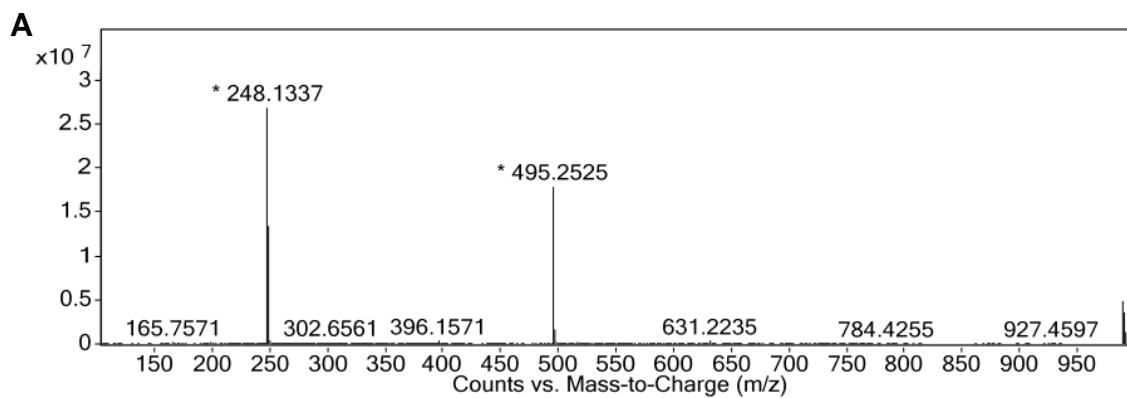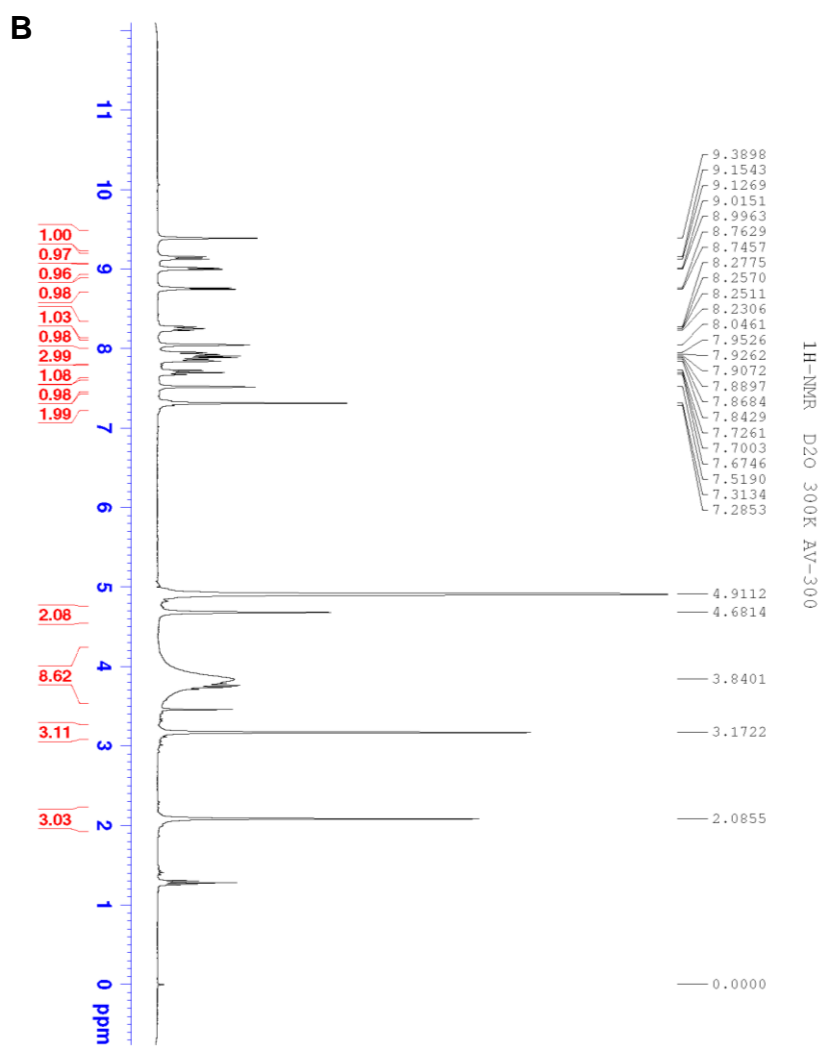

C13-NMR D2O 300K AV-300

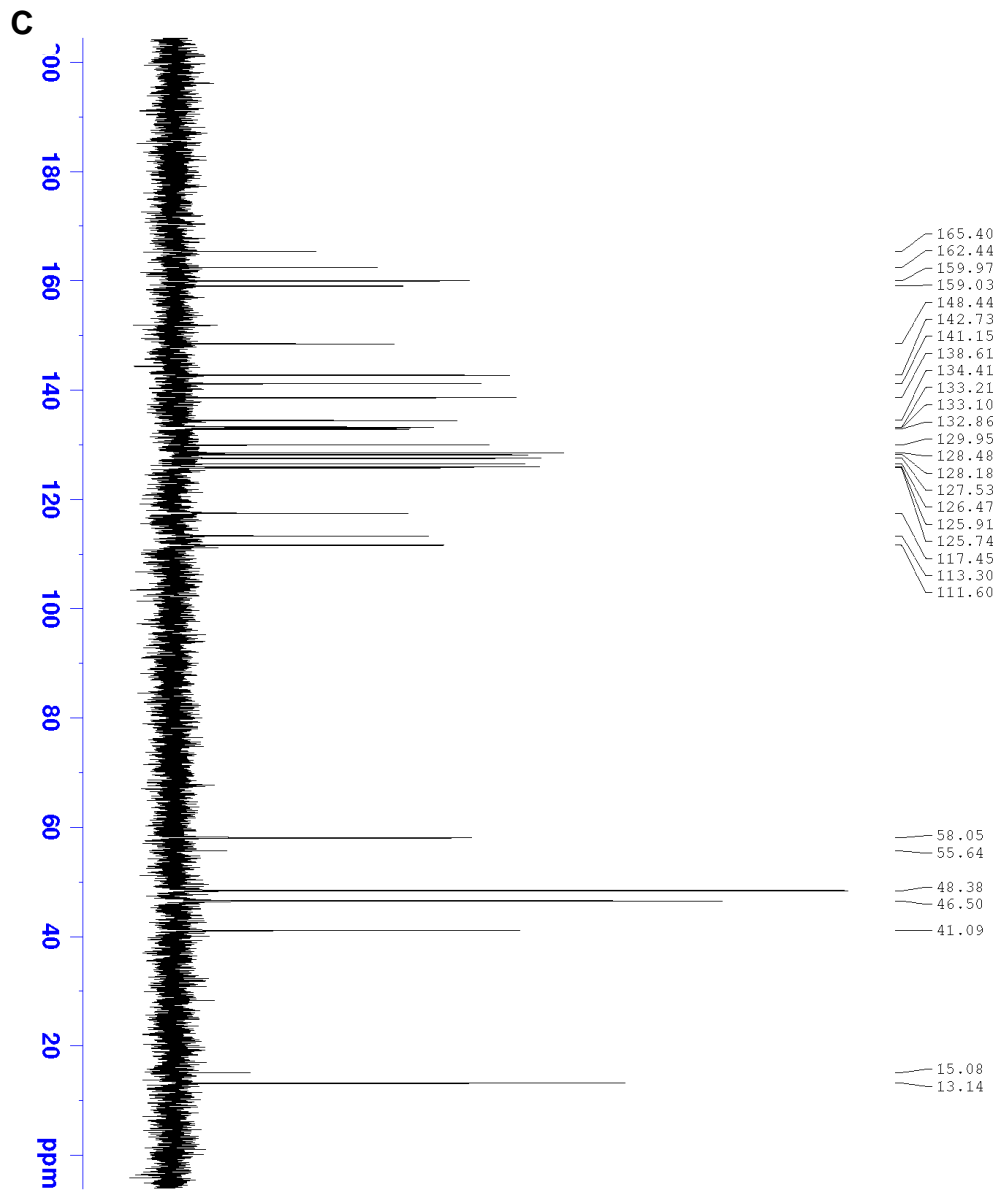

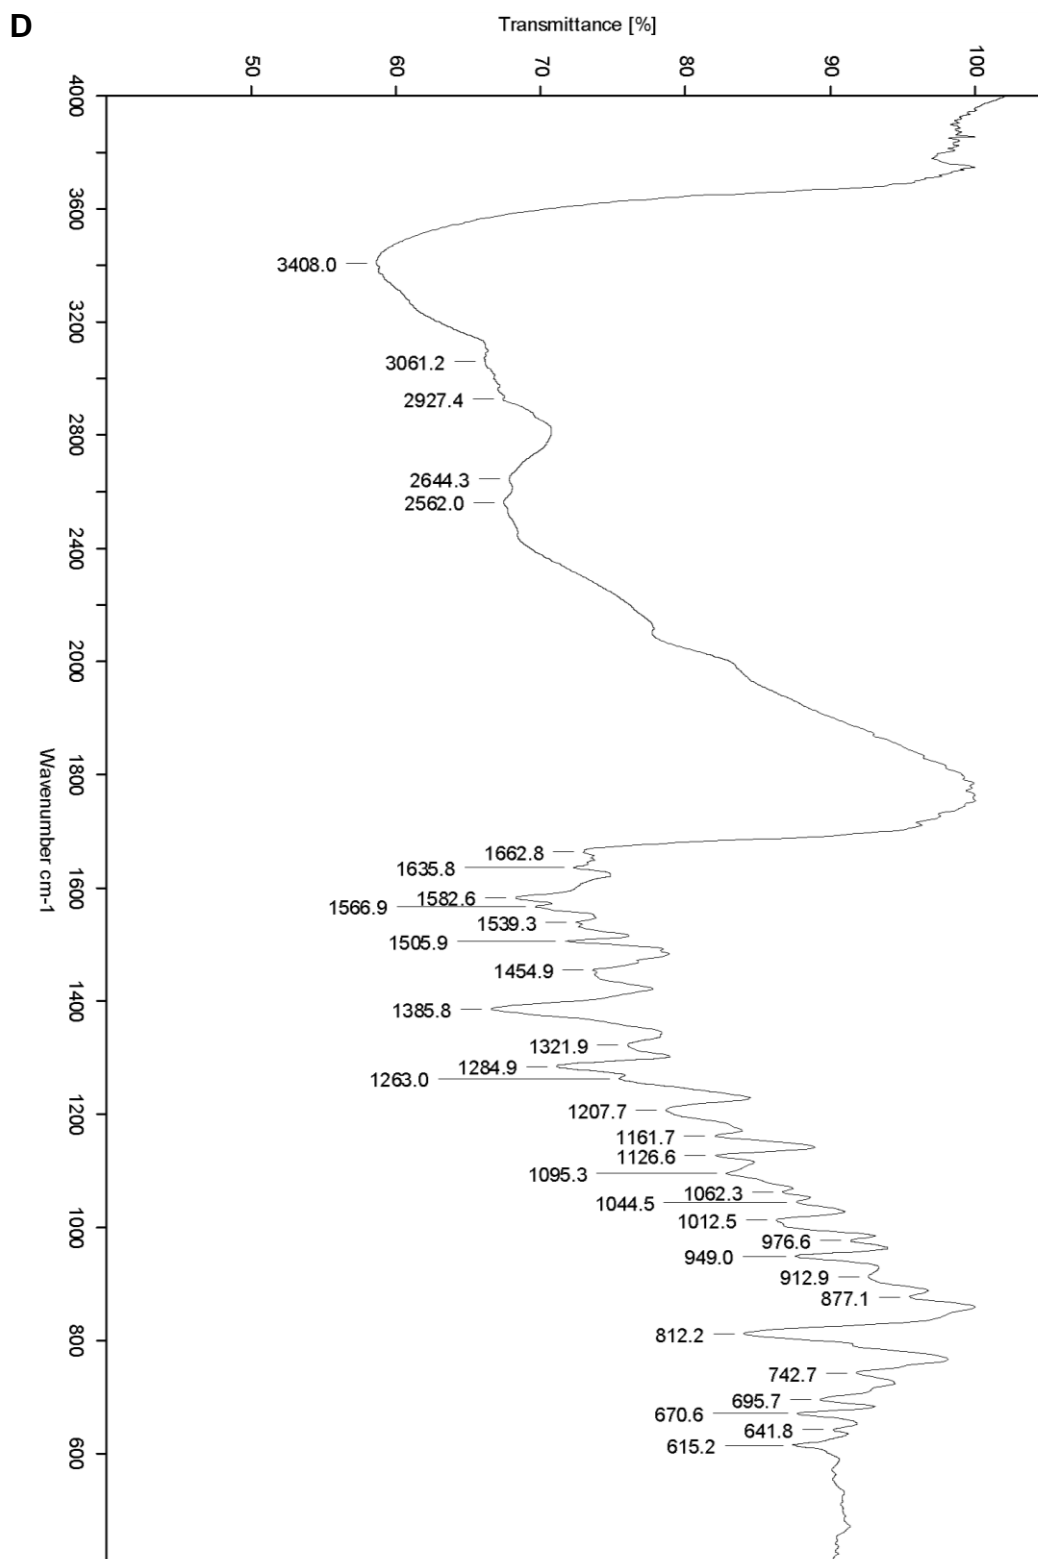

**Supplementary Figure S1: HRMS,  $^1\text{H}$  and  $^{13}\text{C}$  NMR and IR analyses of TGI1002.**

(A) Mass spectrum of TGI1002, chemical formula  $\text{C}_{29}\text{H}_{30}\text{N}_6\text{O}_2$ , calculated  $m/z$

495.2430 [M+H]<sup>+</sup>, observed m/z 495.2525 [M+H]<sup>+</sup>. **(B)** <sup>1</sup>H NMR (300 MHz, D<sub>2</sub>O).

**(C)** <sup>13</sup>C NMR (75 MHz, D<sub>2</sub>O). **(D)** IR spectrum.



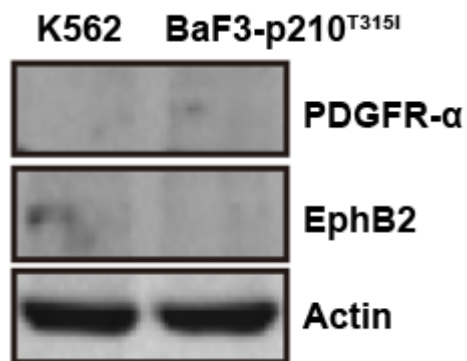

**Supplementary Figure S2: Western blots of PDGFR $\alpha$  and EphB2 expression in K562 and BaF3-p210<sup>T315I</sup> cells.** Cell lysates from K562 and BaF3-p210<sup>T315I</sup> cells were run on SDS-PAGE and Western blotted with anti-PDGFR $\alpha$ , anti-EphB2 or anti- $\beta$ -actin antibodies. Neither PDGFR $\alpha$  nor EphB2 was observed in K562 and BaF3-p210<sup>T315I</sup> cell lysates.

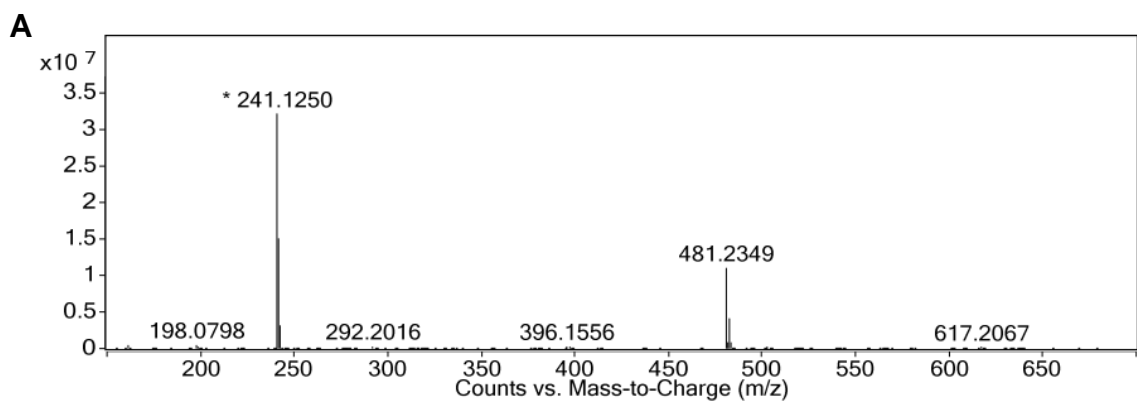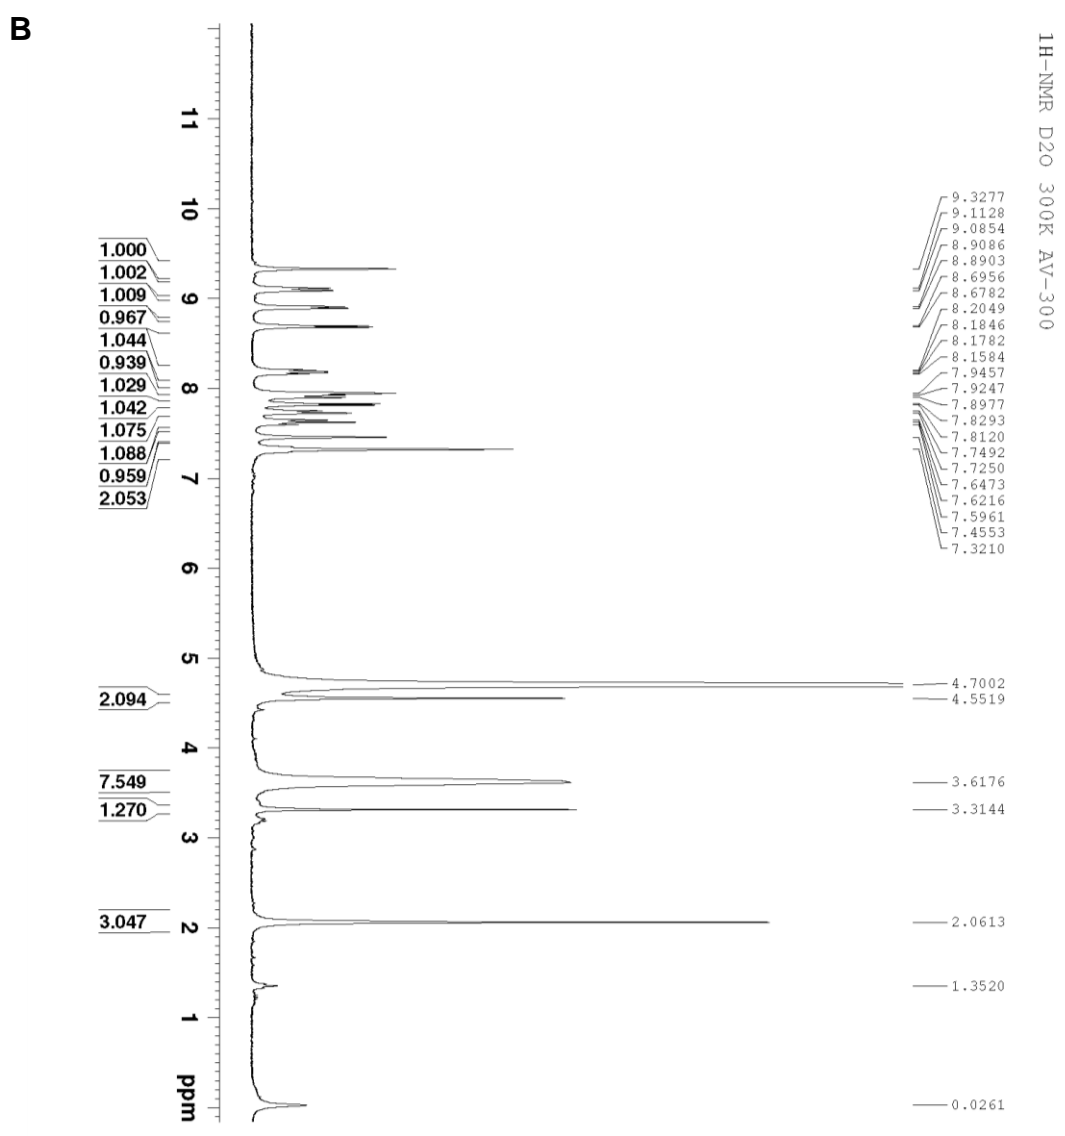

13C-NMR D2O 300K AV-300

- 170.632
- 167.040
- 165.050
- 164.453
- 163.808
- 153.029
- 147.655
- 145.388
- 143.063
- 138.760
- 137.916
- 137.629
- 137.564
- 134.535
- 132.984
- 132.637
- 131.997
- 130.776
- 130.703
- 130.437
- 122.585
- 118.328
- 116.216

62.871

50.689

43.312

17.494

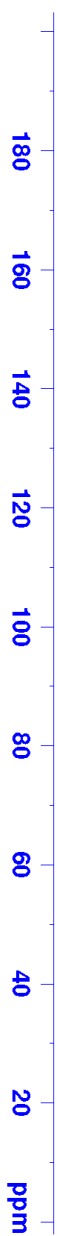

C

**D**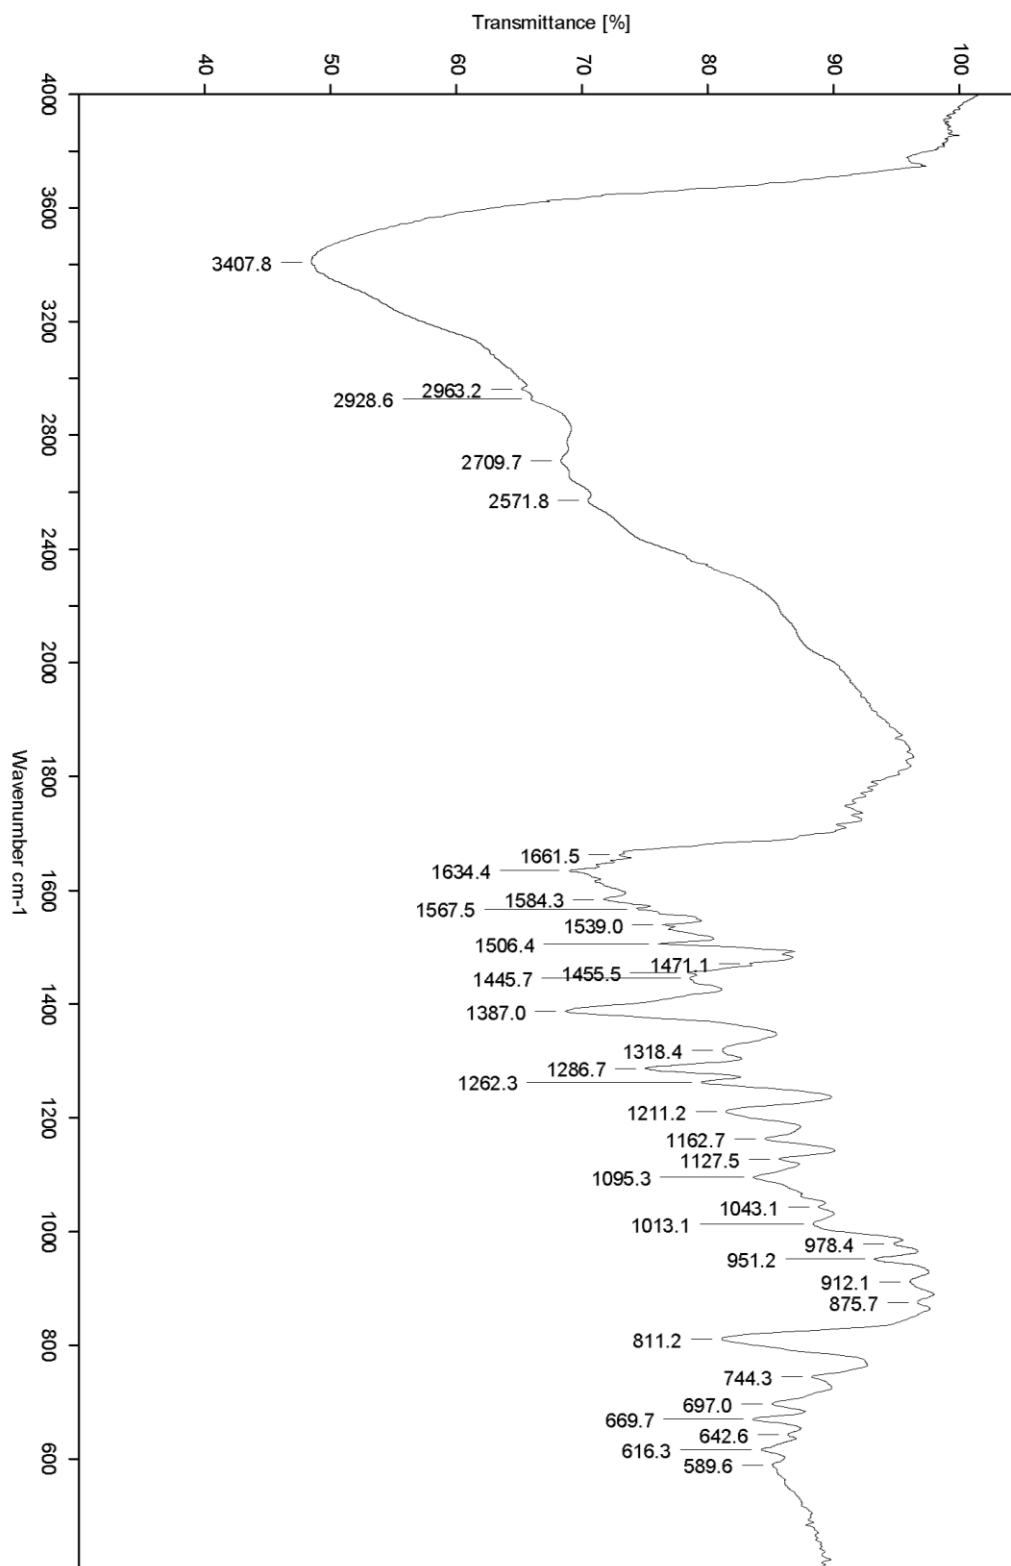

**Supplementary Figure S3: HRMS, <sup>1</sup>H and <sup>13</sup>C NMR and IR analyses of 10. (A)**

Mass spectrum of compound **10**, chemical formula C<sub>28</sub>H<sub>28</sub>N<sub>6</sub>O<sub>2</sub>, calculated m/z

481.2274 [M+H]<sup>+</sup>, observed m/z 481.2349 [M+H]<sup>+</sup>. (B) <sup>1</sup>H NMR (300 MHz, D<sub>2</sub>O).

(C) <sup>13</sup>C NMR (75 MHz, D<sub>2</sub>O). (D) IR.

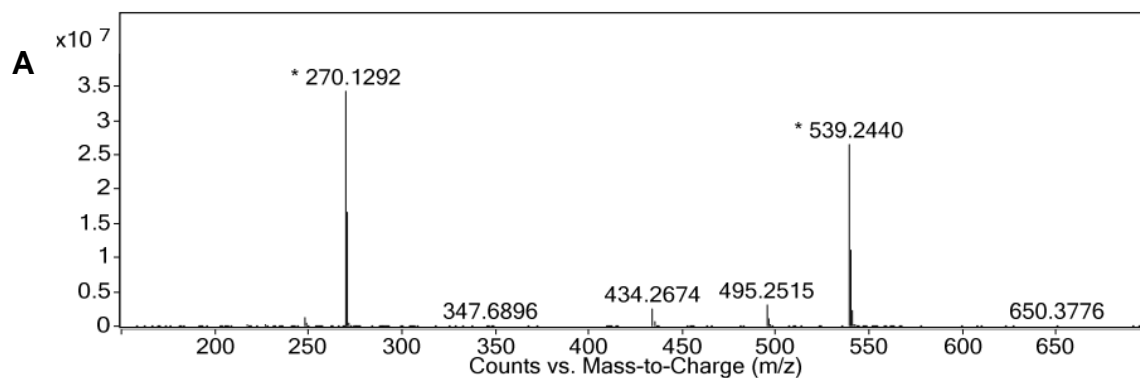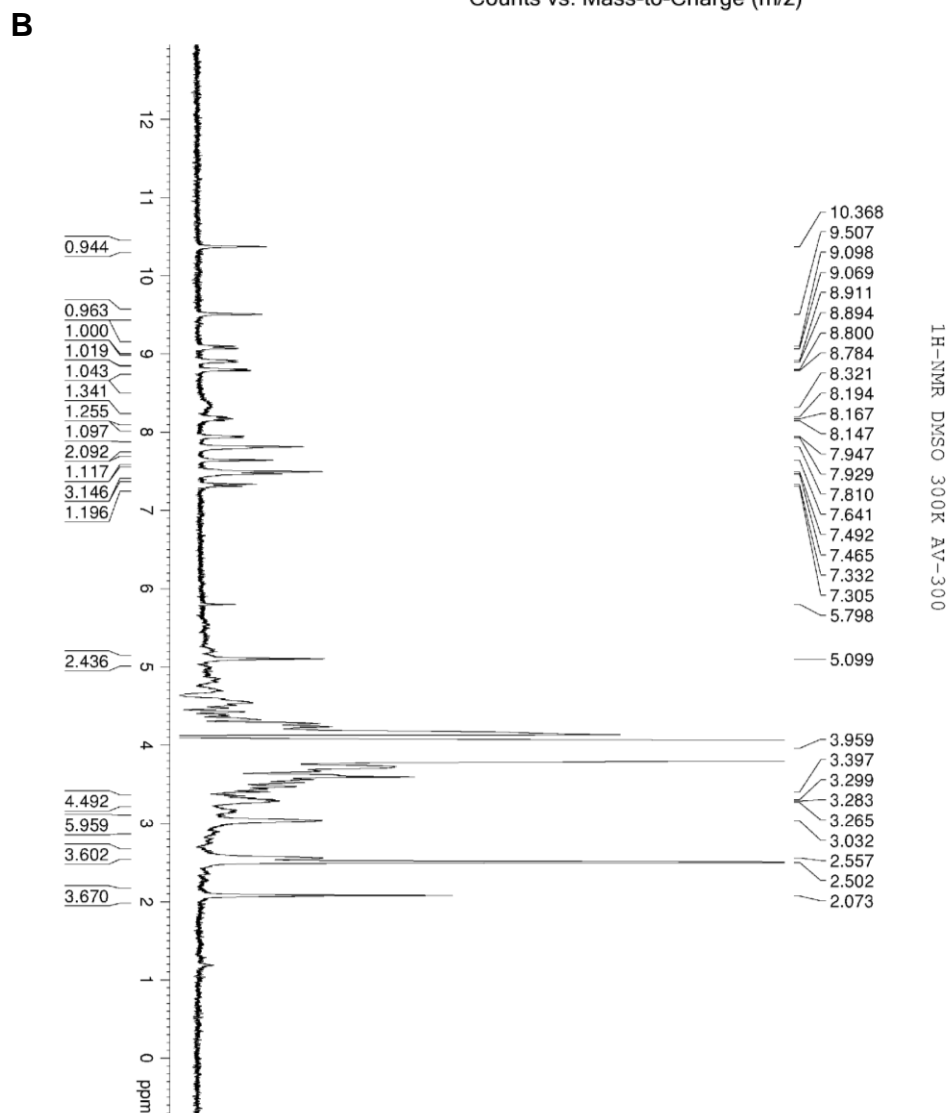

**C**

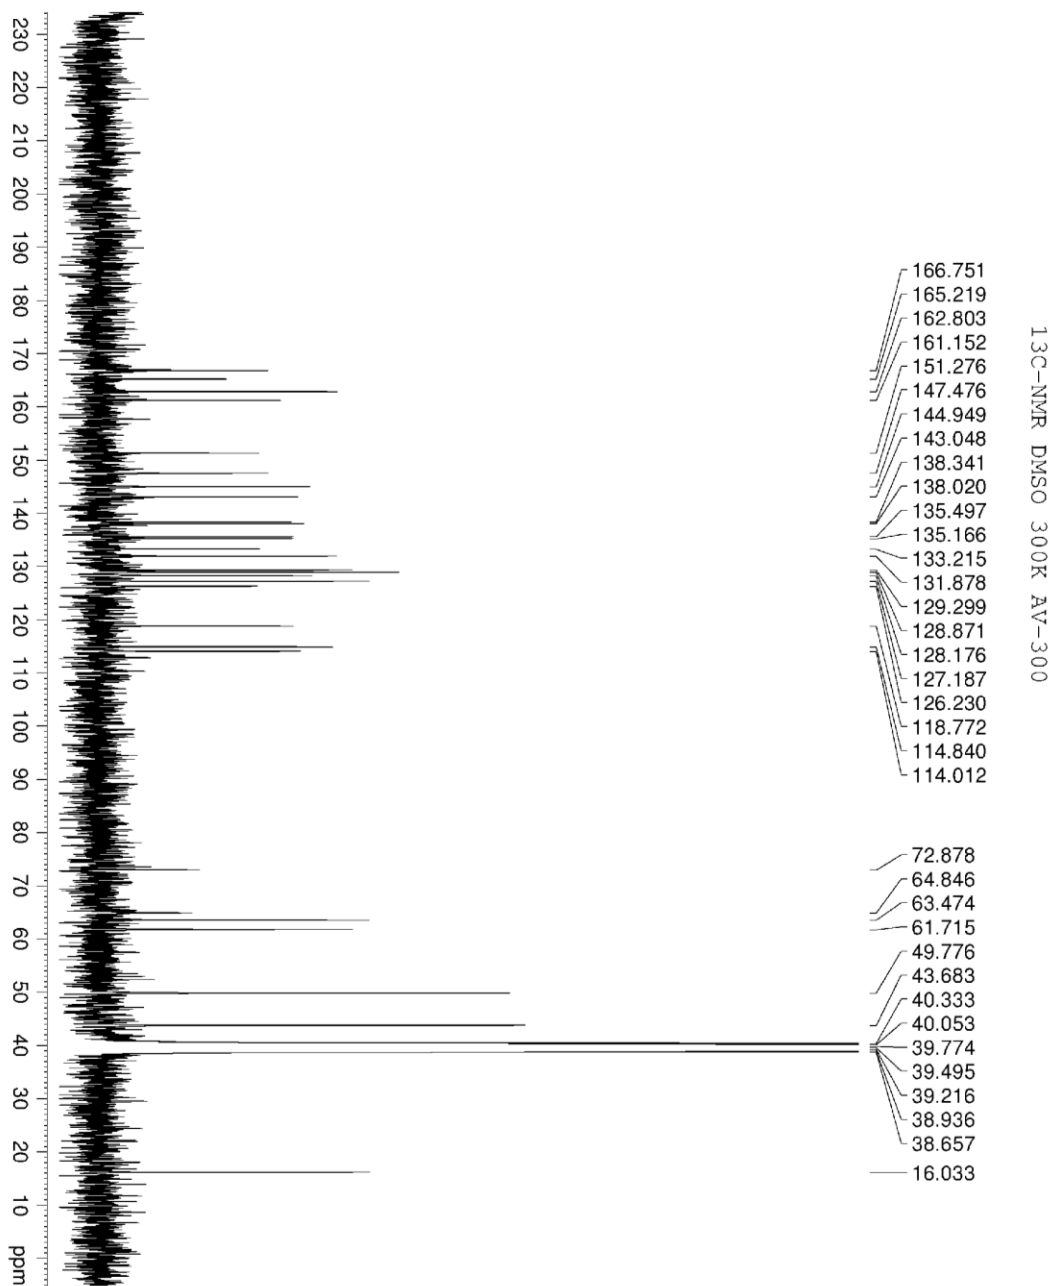

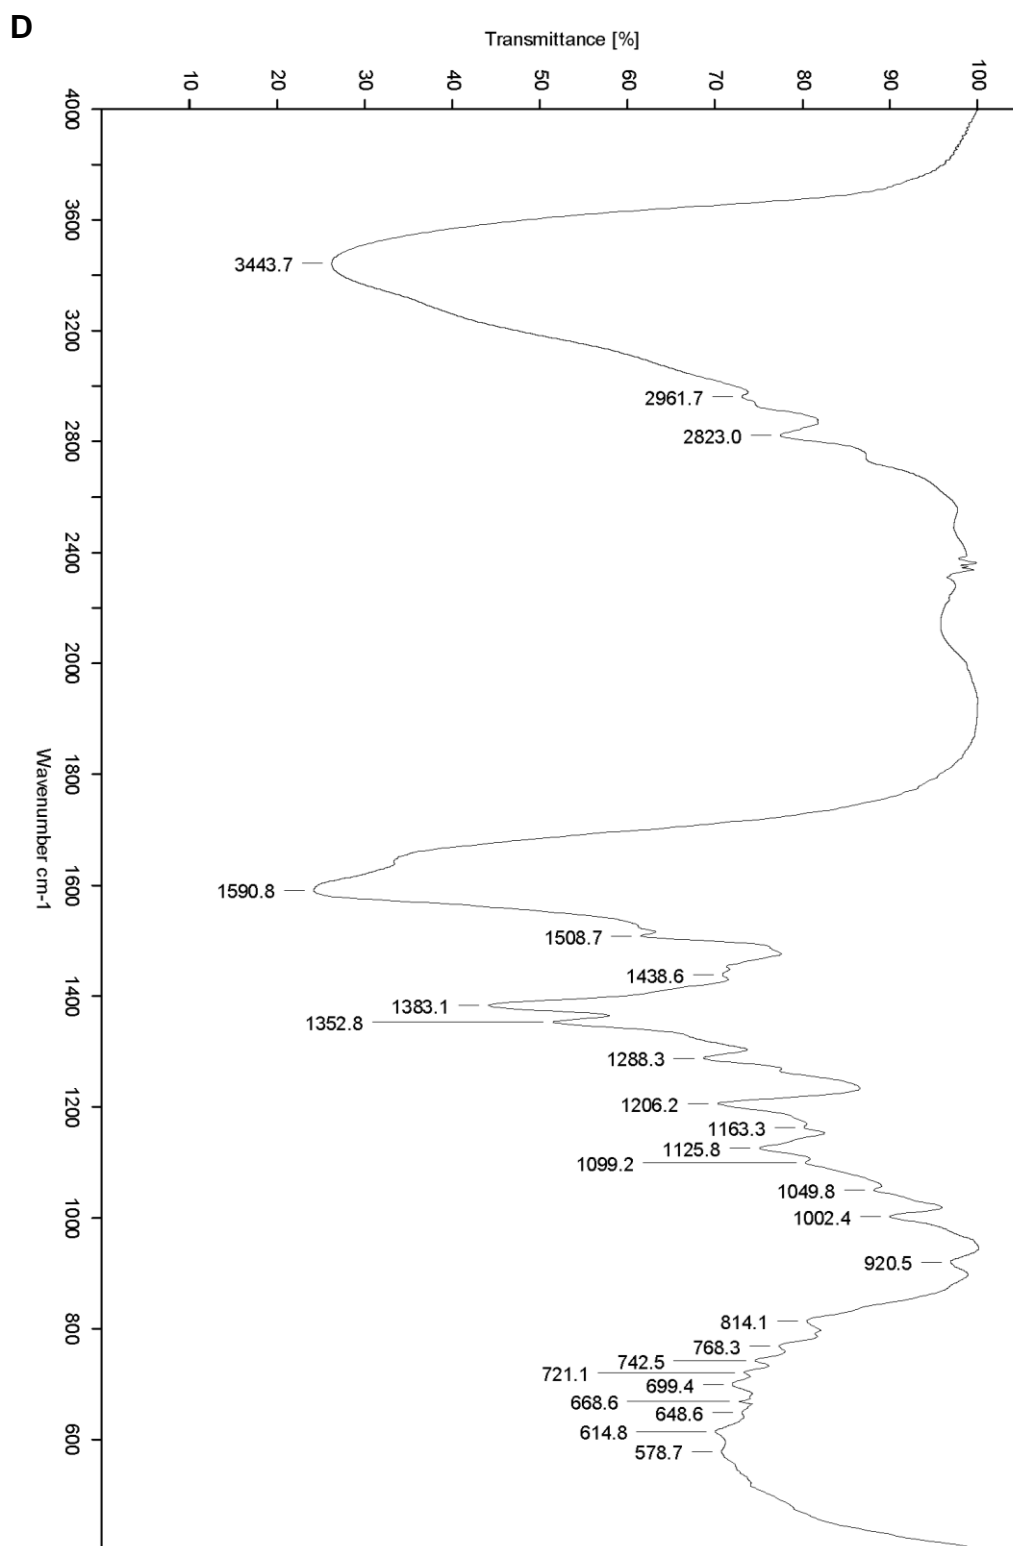

**Supplementary Figure S4: HRMS, <sup>1</sup>H and <sup>13</sup>C NMR and IR analyses of TGI1002-COOH. (A) Mass spectrum of TGI1002-COOH, chemical formula**

$C_{30}H_{30}N_6O_4$ , calculated  $m/z$  539.2329  $[M+H]^+$ , observed  $m/z$  539.2440  $[M+H]^+$ . (**B**)

$^1H$  NMR (300 MHz, DMSO). (**C**)  $^{13}C$  NMR (75 MHz, DMSO). (**D**) IR.



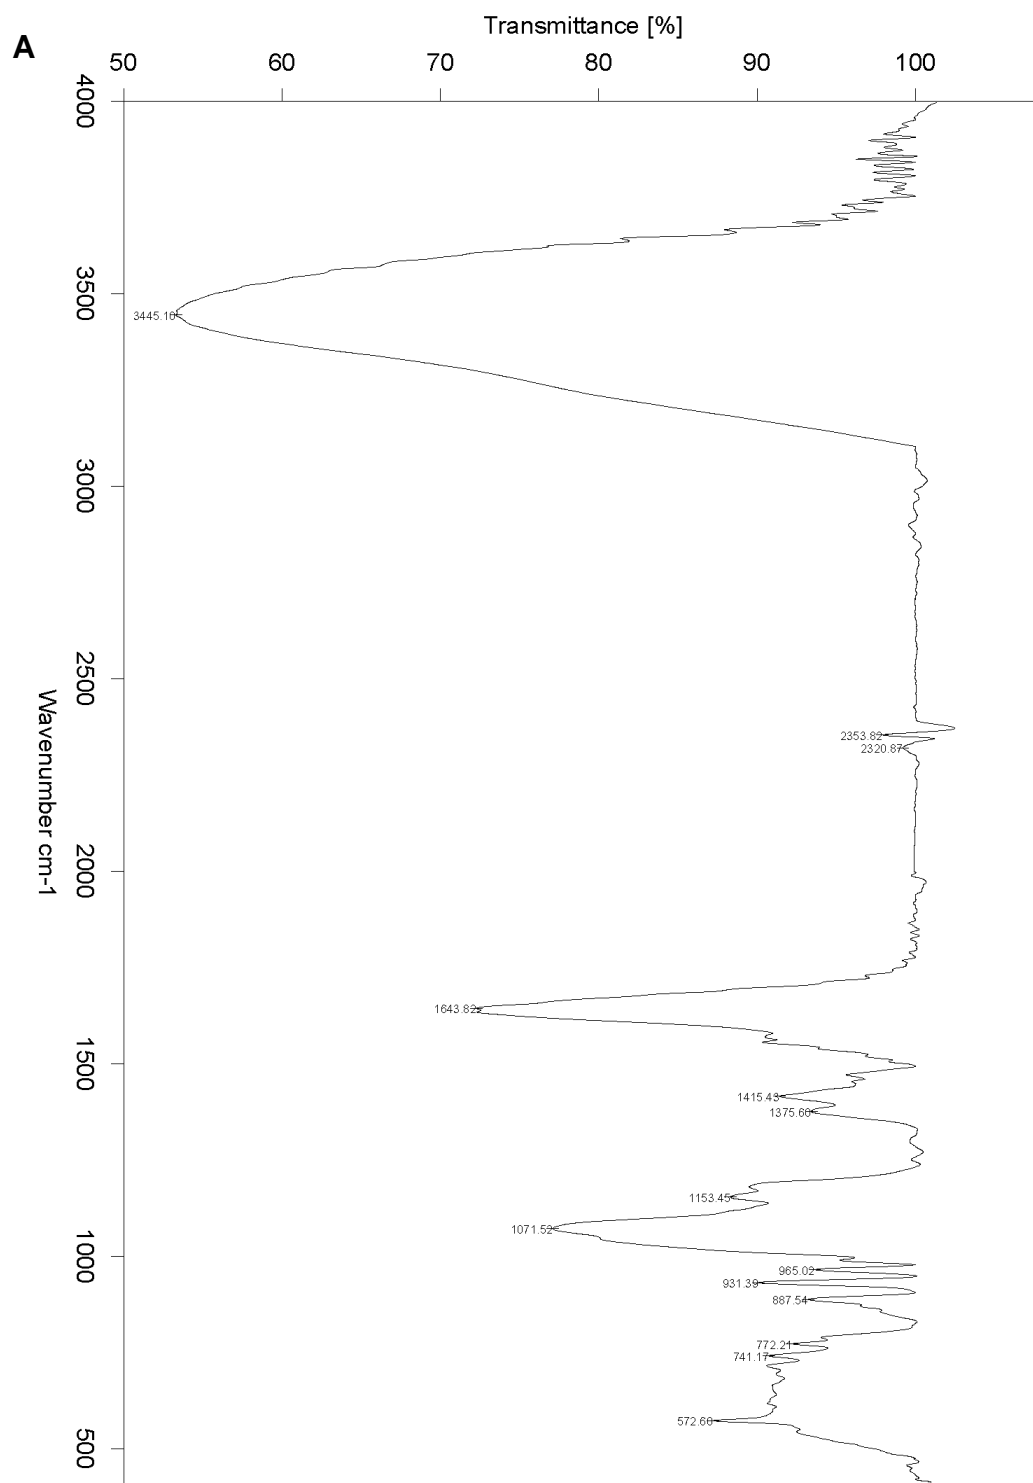

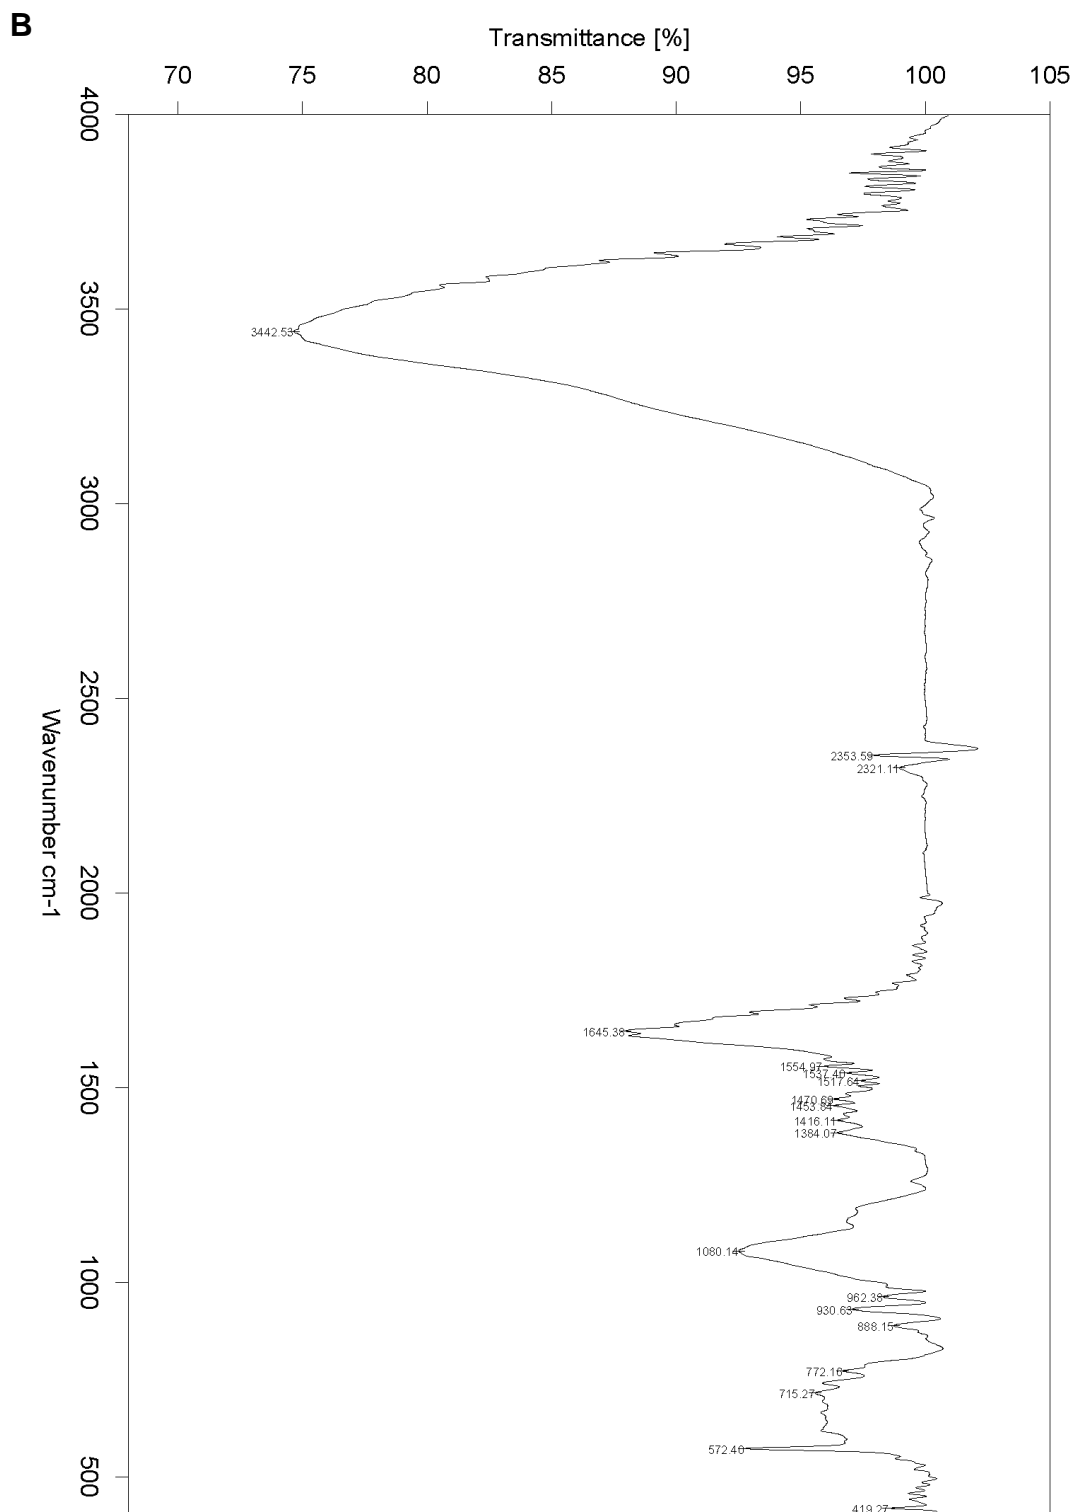

**Supplementary Figure S5: IR spectral analysis of TGI1002-affinity probe. (A)**

EAH-Sepharose 4B. **(B)** TGI1002-affinity probe.

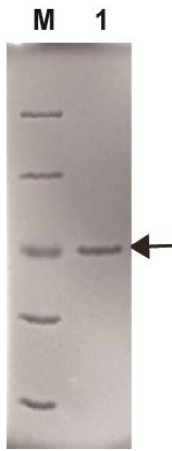

**Supplementary Figure S6: SDS-PAGE of purified SET protein.** *Lane M*, protein molecular weight markers. Arrow shows purified recombinant SET.

**Supplementary Table S1: *In vitro* profile on kinase inhibition of TGI1002 (1  $\mu$ M).**

| Kinase name       | Inhibitory effect (%) | IC <sub>50</sub> ( $\mu$ M) | Kinase name                     | Inhibitory effect (%) | IC <sub>50</sub> ( $\mu$ M) |
|-------------------|-----------------------|-----------------------------|---------------------------------|-----------------------|-----------------------------|
| ABL1              | 4.30                  | N.D.                        | GSK3 $\alpha$                   | 2.60                  | N.D.                        |
| ABL2              | 19.18                 | N.D.                        | GSK3 $\beta$                    | 2.59                  | N.D.                        |
| AKT1              | 5.07                  | N.D.                        | HER2                            | 7.88                  | N.D.                        |
| AKT2              | 4.72                  | N.D.                        | IGF1R                           | 8.65                  | N.D.                        |
| AKT3              | 3.62                  | N.D.                        | InsR                            | 3.70                  | N.D.                        |
| ALK               | 4.27                  | N.D.                        | JNK1                            | 0.20                  | N.D.                        |
| AMPK (A1/B1/G1)   | 0.19                  | N.D.                        | KDR                             | 0.64                  | N.D.                        |
| AMPK (A2/B1/G1)   | 2.57                  | N.D.                        | LCK                             | 5.82                  | N.D.                        |
| Aurora A          | 24.58                 | N.D.                        | NEK2                            | 1.56                  | N.D.                        |
| Aurora B          | 0.00                  | N.D.                        | p38 $\alpha$                    | 2.17                  | N.D.                        |
| AXL               | 3.03                  | N.D.                        | p38 $\beta$                     | 0.20                  | N.D.                        |
| BLK               | 3.39                  | N.D.                        | <b>PDGFR<math>\alpha</math></b> | <b>43.53</b>          | <b>3.28</b>                 |
| BRAF              | 2.30                  | N.D.                        | PDGFR $\beta$                   | 17.16                 | N.D.                        |
| BRAF(v599E)       | 3.61                  | N.D.                        | PKA $\alpha$                    | 5.96                  | N.D.                        |
| CAMK1             | 4.93                  | N.D.                        | PKA $\beta$                     | 6.50                  | N.D.                        |
| CDK1/CyclinA2     | 5.27                  | N.D.                        | PKA $\gamma$                    | 1.45                  | N.D.                        |
| CDK2/CyclinA2     | 1.54                  | N.D.                        | PKC $\alpha$                    | 5.57                  | N.D.                        |
| CDK1/CyclinB      | 3.24                  | N.D.                        | PKC $\beta$                     | 0.79                  | N.D.                        |
| CDK4/CyclinD1     | 7.54                  | N.D.                        | PKC $\xi$                       | 13.29                 | N.D.                        |
| CHK1              | 3.61                  | N.D.                        | PLK1                            | 1.63                  | N.D.                        |
| c-KIT             | 15.25                 | N.D.                        | PLK2                            | 3.52                  | N.D.                        |
| c-KIT(V654A)      | 11.68                 | N.D.                        | PLK3                            | 4.71                  | N.D.                        |
| EGFR              | 0.00                  | N.D.                        | RAF1                            | 5.37                  | N.D.                        |
| EGFR(T790M,L858R) | 8.74                  | N.D.                        | RET                             | 12.16                 | N.D.                        |
| EphA1             | 1.58                  | N.D.                        | RON                             | 0.14                  | N.D.                        |
| <b>EphB2</b>      | <b>46.69</b>          | <b>1.27</b>                 | SRC                             | 1.09                  | N.D.                        |
| ERK1              | 0.01                  | N.D.                        | TrkA                            | 3.11                  | N.D.                        |
| ERK2(MAPK1)       | 0.00                  | N.D.                        | TrkB                            | 5.58                  | N.D.                        |
| FGFR1             | 9.71                  | N.D.                        | PI3K $\alpha$                   | 2.66                  | N.D.                        |
| FGR               | 7.53                  | N.D.                        | PI3K $\beta$                    | 0.00                  | N.D.                        |
| FLT1(VEGFR1)      | 1.97                  | N.D.                        | PI3K $\gamma$                   | 2.65                  | N.D.                        |
| FLT3              | 2.97                  | N.D.                        | PI3K $\delta$                   | 0.71                  | N.D.                        |

Data represent the means of two independent experiments. N.D. = not determined.

**Supplementary Table S2: MALDI-TOF-TOF analysis of TGI1002 binding proteins.**

| Name | NCBI ID                      | Peptide<br>Matched | Sequence<br>Coverage ( %) | Theroetical<br>Mr/pI | Protein Name                                             |
|------|------------------------------|--------------------|---------------------------|----------------------|----------------------------------------------------------|
| BP1  | <a href="#">gi 12654329</a>  | 22                 | 46                        | 64749/5.1            | HSP90AA1 protein                                         |
| BP2  | <a href="#">gi 338695</a>    | 20                 | 53                        | 50240/4.75           | Beta-tubulin                                             |
| BP3  | <a href="#">gi 512485</a>    | 14                 | 44                        | 47498/8.39           | Acetylcholine<br>receptor-associated<br>protein (Rapsyn) |
| BP4  | <a href="#">gi 145843637</a> | 7                  | 35                        | 26593/4.73           | SET protein                                              |
